# Greening and Browning in a Climate Change Hotspot: The Mediterranean Basin

JULI G. PAUSAS<sup>1</sup> AND MILLÁN M. MILLÁN

*To improve predictions of the future of ecosystems in a changing world, it is necessary to consider fine-scale processes. We propose that for the Mediterranean region (a hotspot of climate change and biodiversity), there are three local processes that have often been overlooked in predictive models and that are key to understanding vegetation changes: rural abandonment that increases wildlands, population changes that boost fire ignitions, and coastal degradation that enhances drought. These processes are not directly driven by global warming and act in different directions (greening and browning). The current balance is still toward greening, because land abandonment is buffering the browning drivers; however, it is likely to switch with increasing warming. The challenge is to mitigate the browning processes. Given that climatic warming is not directly driving these processes, local management can make a difference in reducing the overall impact on the landscape and society.*

*Keywords: global change, climate change, water cycling, Mediterranean Basin, Mediterranean ecosystems, wildfires, land abandonment, local scale processes*

**O**ur planet is going through an unprecedented change that affects all ecosystems and organisms. The magnitude of these effects and the mechanisms involved vary among ecosystems because of differing environmental conditions, varying past and present land uses, and differing historical and evolutionary legacies. Only by acquiring a detailed understanding of the diversity of processes operating at different scales and in different regions can we improve predictions for the future of our planet (Taylor et al. 2017, Tierney et al. 2017). In the present article, we focus on the paleartic Mediterranean region (table 1), which is a biogeographical, environmental, and historical unit, as well as a biodiversity hotspot (Myers et al. 2000, Thompson 2005, Keeley et al. 2012). By the Mediterranean region we refer to the land with a Mediterranean climate that is around the Mediterranean Sea (including all the islands; figure 1). It is a large and highly populated area and a top tourist and retirement destination. The climate dynamics of this region are strongly determined by the enclosed sea (the world's largest inland sea) and the mountains that surround it; these characteristics generate mesoscale atmospheric processes with consequences far beyond the region. Environmental disruptions in the Mediterranean region have consequences in this large densely populated region, as well as in the whole catchment area (which exceeds the Mediterranean climate zone, see figure 1) and elsewhere through atmospheric

teleconnections (Gangoiti et al. 2006, Ciarlo and Aquilina 2016, Park et al. 2016).

Anthropogenic increases in greenhouse gases and the associated increase in temperature are affecting all ecosystems including those in the Mediterranean region (IPCC 2014). The region is considered a primary climate change hotspot (Giorgi 2006, Giorgi and Lionello 2008), because the warming of this region is above the global average (approximately 1.3 degrees Celsius [°C] versus 0.85°C worldwide; Guiot and Cramer 2016). There is abundant literature documenting recent climatic changes (e.g., Bolle 2003, Pausas 2004, Mariotti et al. 2008, Lelieveld et al. 2012, Skliris et al. 2018); however, the present article is focused on some local drivers that are more specific (although not exclusive) to the region, and that have often been overlooked in global and regional vegetation models. For instance, Guiot and Cramer (2016) suggest that a warming of 2°C above preindustrial levels in the Mediterranean region (i.e., the threshold proposed by the 2015 Paris Agreement) would generate vegetation changes of a magnitude unprecedented over the past 10,000 years. This is important because the region is currently near this threshold (Guiot and Cramer 2016). The results were obtained by comparing past (pollen reconstructed), present, and future biome distribution using a simulation model. The predictive models were based on the main drivers of global change—that is, temperature (monthly) and CO<sub>2</sub> (annual),

**Table 1. Mediterranean basin facts. Extent, diversity and characteristics of the Mediterranean climate region (figure 1).**

| Parameter                                       | Value                                             |
|-------------------------------------------------|---------------------------------------------------|
| Extension of the land                           | 2 million square kilometers (km <sup>2</sup> )    |
| Sea area                                        | 2.5 million km <sup>2</sup>                       |
| Drainage region (figure 1)                      | 11 million km <sup>2</sup>                        |
| Population                                      | Approximately 200 million                         |
| Population density                              | Approximately 100 inhabitants per km <sup>2</sup> |
| East–west distance                              | 3800 kilometers (km)                              |
| North–south distance                            | >1000 km                                          |
| Coast length                                    | > 40,000 km                                       |
| Number of languages                             | > 20                                              |
| Number of countries                             | 18                                                |
| Number of islands                               | > 4000                                            |
| Number of islands larger than 5 km <sup>2</sup> | 189                                               |
| Highest altitude                                | 4167 meters                                       |
| Number of WWF ecoregions                        | 21                                                |
| Number of plant species                         | 25,000                                            |
| Number of mammal species                        | 305                                               |
| Number of reptile species                       | 351                                               |
| Number of bird species                          | 601                                               |

Note: Values are approximate as different sources use slightly different limits of the Mediterranean climate area.

simulated at a coarse scale (grid of 2° latitude × 4° longitude; approximately 222 × 346 kilometers).

Our hypothesis is that to increase the accuracy of vegetation change predictions, we need to integrate processes operating at a smaller scale. Specifically, we propose that the main current dynamic drivers in the Mediterranean region are rural (land) abandonment, wildfires driven by human ignitions, and coastal degradation. These often overlooked drivers are mostly caused by local socioeconomic and human changes not directly linked to global warming, and they are key to understanding the disruption of the natural fire and drought regimes in Mediterranean ecosystems (mainly, increasing frequency, and intensity; figure 2). Although other drivers of change remain very important, we propose that these three drivers have important consequences for understanding and predicting current and future vegetation changes.

### The greening: Rural abandonment provides biomass and fuel

Many ecoregions worldwide are suffering from an increase in fragmentation accompanied by a reduction in the area covered by natural ecosystems. Others show the opposite pattern, as is the case of ecosystems in the Mediterranean region. This region has been extensively and intensely used for millennia; it is the cradle of Western civilization, and since then, many cultures have inhabited the region, some with very high population densities. The consequence is that Mediterranean landscapes have been extensively

modified by deforestation and overgrazing, and much of the land is farmed. However, recent (late twentieth century) socioeconomic changes in the region (due to industrialization and tourism) have led many people to abandon rural areas. Therefore, these areas are emptying, and urban and periurban areas are increasingly crowded. These processes imply, in many Mediterranean landscapes, an abrupt reduction of land for agriculture, grazing, and wood gathering and poor management of forest plantations. Some imprints of the past land overuse are easily observable (e.g., figure 3).

The first and direct consequence of this process is a sudden increase of wildlands and plant biomass. Old fields are now a primary feature in many Mediterranean landscapes, which increases the amount and connectivity of vegetation in many regions. Many European Mediterranean landscapes are defaunated of large herbivores and resemble grazing exclusion experiments, because the loss of livestock has

not been accompanied by an increase in wild herbivores that once occupied the land. In addition, forest plantations are poorly maintained—further increasing the biomass and connectivity of the landscapes. A comparison of the current landscapes with old photographs (Debusche et al. 1999) and old maps (Falcucci et al. 2007) or comparisons among consecutive forest inventories (Vayreda et al. 2012, De Cáceres et al. 2015) show a clear increase in wildlands and forest tree density. Even remote-sensing data gathered over the last 15 years suggest a generalized greening of the region compared with global trends (figure 4a). The atmospheric increase in carbon dioxide (CO<sub>2</sub>) may have contributed to biomass growth but is unlikely to be the main driver as the magnitude of the greening is greater than global estimates (figure 4a). The Mediterranean region is a greening hotspot, despite also being a climate change hotspot (Giorgi 2006).

A consequence of this vegetation increase in a warming climate is increased drought stress and mortality in plants. That is, in addition to direct climate-induced drought mortality that may be occurring independently of any recent vegetation changes (Barbeta et al. 2015, Lloret et al. 2016), there is drought stress and mortality attributed to the increased vegetation density, plant competition, and natural self-thinning processes (Vayreda et al. 2012, De Cáceres et al. 2015). These processes are natural in plant communities, but they now occur in a low grazing and high CO<sub>2</sub> environment that increases the magnitude of the plant stress and mortality.

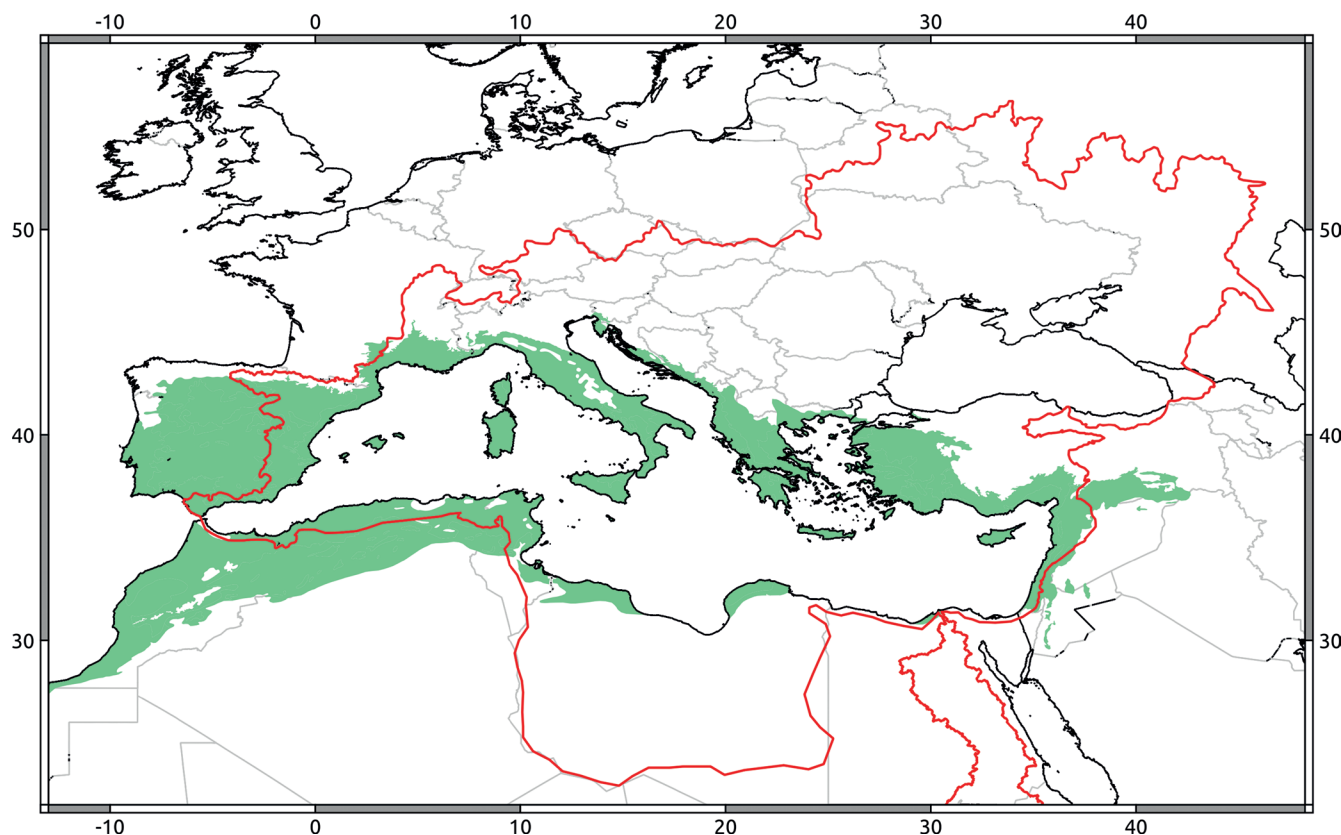

**Figure 1.** The region with a Mediterranean climate (filled region) surrounds the Mediterranean Sea, but the whole Mediterranean catchment is far larger (the thick red line). Therefore, atmospheric processes occurring in the Mediterranean Sea can have hydrological implications in the central and eastern part of the European continent. Sources: Cortambert (1870), the World Wildlife Fund, Jenness and colleagues (2007), Millán (2014).

### **Browning: Semiurban population provides ignitions**

Land abandonment and the associated increase in vegetation imply an increase in the amount and connectivity of fuels and, therefore, in fire hazard. This is occurring in an area where human population is increasing—especially the urban population (i.e., people not living from the land) in the wildland–urban interface (Modugno et al. 2016). The consequence of such human changes is an increase in fire ignitions (by negligence and arson) and, given the large amount of fuel available in the landscape, an increase in the fire size and annual area burned (Pausas 2004, Moreira et al. 2011, Pausas and Fernández-Muñoz 2012). This leads to an increase in fire recurrence at the local scale. Simultaneously with this increase in fuel and ignitions, there has been a strong policy of fire suppression in most countries, which further promotes fuel accumulation and large fires (Piñol et al. 2007). The increased frequency of conditions conducive to fire (hotter and longer fire seasons due to global warming; Moriondo et al. 2006) have further contributed to this recent fire regime shift (figure 2). However, the major change in fuel amount and distribution is probably the most important driver of abrupt fire regime changes (Pausas and Fernández-Muñoz 2012, Pausas and Keeley 2014). In

Mediterranean Europe, fires used to be fuel limited when the rural population was large, and fires are now driven by drought events, because fuel is no longer a limiting factor (Pausas and Fernández-Muñoz 2012, Gouveia et al. 2016). In northern Africa, where the rural population is still significant, fires are smaller and fuel limited (Chergui et al. 2018). Failing to consider land abandonment precludes predicting fire regime shifts and vegetation changes in the Mediterranean region.

Vegetation changes can be depicted by discontinuities in the normalized difference vegetation index (NDVI) from remote sensing (Verbesselt et al. 2010). Abrupt discontinuities in the NDVI are common in the Mediterranean region (figure 4b) and can be produced by major droughts, logging activities, or fires. Fire regime shifts that can generate abrupt vegetation changes are especially important. Mediterranean ecosystems have an evolutionary history linked to fire; however, disruptions in sustainable fire regimes are common (Keeley et al. 2012). For instance, nonserotinous coniferous forests were not historically subject to fire—or were subject to low intensity understory fires that left the forest structure unaffected (Fulé et al. 2008, Slimani et al. 2014). However, some of these forests are now suffering high-intensity crown

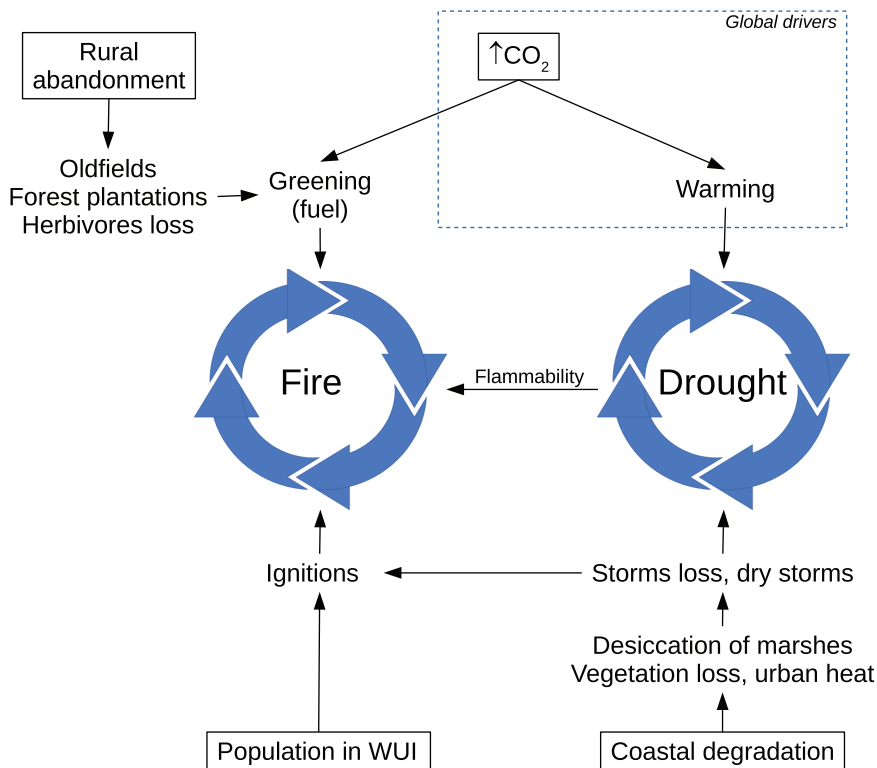

**Figure 2.** The disruption of the natural fire and drought regimes in the Mediterranean landscapes is driven by global and local drivers. Increased fire activity is a response to the fuel amount and landscape homogeneity generated by rural abandonment (fire hazard) in an environment depauperate of herbivores and with increasing human ignitions (fire risk) and droughts (fire weather). The increased dry conditions are the consequence of global warming—but also of storm losses caused by the disruption of the water cycle generated by the coastal degradation (see the main text and supplementary material S2). Abbreviation: WUI, wildland–urban interface.

fires because of increased crowding (related to reduced grazing and lack of low intensity fires) and warming. A single crown fire in a nonserotinous pine forest abruptly switches the community to a new vegetation state, typically shrubland or oak forest (Retana et al. 2002). In contrast, serotinous pines are well equipped to survive crown fires (Pausas 2015). However, two consecutive fires with an interval shorter than the maturity age of the dominant pine switches the pine forest to shrubland. These vegetation-type switches do not revert easily, especially in human-fragmented landscapes, and are common across the Mediterranean basin (Moreira et al. 2011).

Predictions for the Mediterranean region suggest an increased fire risk in the decades ahead (Bedia et al. 2014, Sousa et al. 2015, Turco et al. 2018). This prediction is often based on climate, and therefore, given the observed and predicted increased temperature and reduced summer rainfall, the conditions for fire spread are increasing. However, for predicting fire regimes (and not just the meteorological conditions conducive to fire—the fire weather), it is necessary to account for other interacting factors, especially those

related to fuel amount and contiguity (fire hazard). Recent simulation studies suggest that including CO<sub>2</sub> and human population dynamics (e.g., urbanization) in climate-based global models, switches the predictions from an increase to a decrease in fire activity at a global scale (Knorr et al. 2016). In the Mediterranean region, such a decrease of fire activity in the (near) future is unlikely in much of the region, because fuel increase from land abandonment (the greening above) together with increased climatic conditions conducive to fire (drought and longer fire seasons) and the continuous increase in human ignitions, provide conditions for larger and more frequent fires (figure 2). Only in very dry regions can more severe drought reduce fuels and so limit fires (Pausas and Paula 2012).

#### **Browning: Coastal degradation enhances drought**

The Mediterranean coastline was once fully vegetated and rich in marshes and lagoons that contributed to the local water cycle. The sea breeze enriched with the water that evaporated and transpired from these ecosystems increased in altitude when moving inland over the coastal mountains and typically condensed before surpassing the mountains. The rich volatile organic compounds emitted by Mediterranean plants contributed to the nucleation of clouds (Kirkby et al. 2016). This water vapor condensation was responsible for convective showers over the mountains around the Mediterranean Sea (Bolle 2003). The desiccation of the marshes (started by the Romans to prevent malaria), deforestation for agriculture, and more recently, explosive coastal urbanization and tourism have drastically reduced the original ecosystems and, therefore, the water available for the sea breeze. These land-use changes have also increased soil heating (the urban heat island effect). The consequences are the destruction of several ecosystems, changes in species composition, a lowering of the water table, changes in the albedo, but also, with a warmer and drier air breeze, the condensation point has increased in altitude and, therefore, storms develop less often (Millán 2014; supplemental material S2). There is evidence in recent decades of reductions in summer (convective-orographic) rainfall and increases in autumnal (often torrential) rain (Pausas 2004, Millán et al. 2005a, Pastor et al. 2015). These summer storm losses affect downstream vegetation and marshes and, therefore, generate a negative feedback process that can lead to aridification

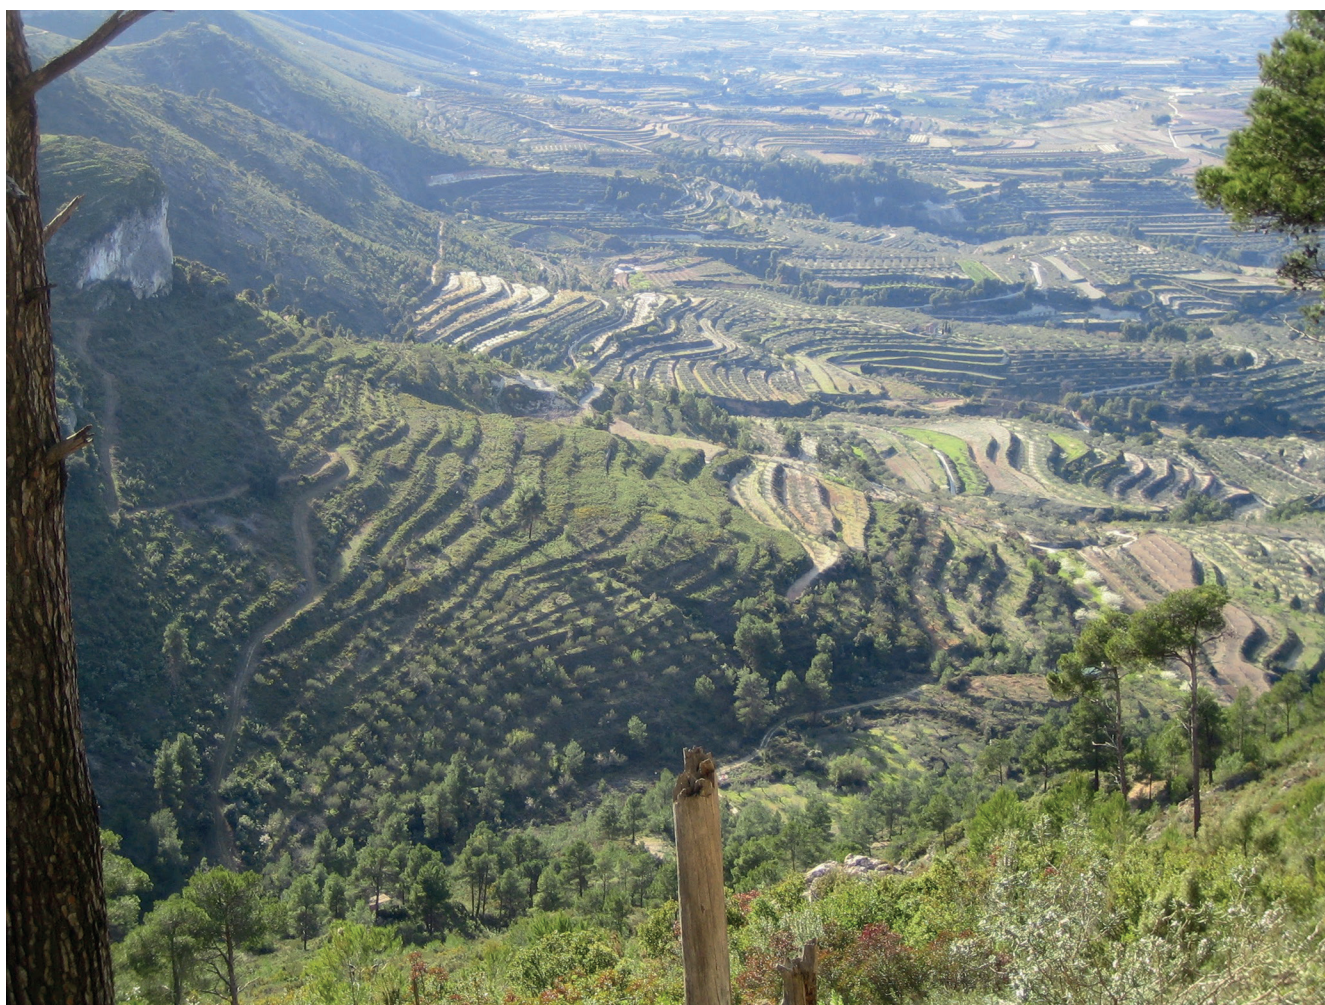

**Figure 3.** Terraced slopes are a common feature of the Mediterranean landscapes and illustrate the strong human pressure in the region. Note that most of the terraces are abandoned and covered by early successional (and flammable) plants, except those at the bottom of the mountains that are still in use. The shrubland and dead trees in the foreground are the product of a wildfire. Location: Benicadell (Valencia, Spain), photograph: J.G. Pausas.

and water shortage for humans. This is not driven by global warming but by local changes in land use, and global warming exacerbates this process by further heating and reducing evapotranspiration (figure 2). This disruption of the water cycle also increases dry storms, which are a cause of wildfires. The water vapor that does not precipitate, together with photooxidants (ozone) and aerosols, increase sea temperature, and this facilitates the water vapor to feed torrential autumnal rains in the region (Bozkurt and Sen 2011, Pastor et al. 2015) and leads to flooding in other parts of the catchment and neighboring areas (figure 1; e.g., central-eastern Europe, Gangoiti et al. 2011; North Africa, Park et al. 2016). Note that this accumulation of water vapor and ozone is very relevant as both are greenhouse gases with high global warming potential (Held and Soden 2000), and there is evidence of heat intensification by greenhouse gases along the coast (Diffenbaugh et al. 2007). In other words, the Mediterranean basin can behave like a large cauldron

recirculating air masses in different directions; it is also an example of how human activities may affect the dynamics of water vapor (an important greenhouse gas).

Land degradation on the coast is not compensated by the greening from the land abandonment outlined above for two reasons. First, most degradation occurs very close to the coastline and replaces natural systems with urban structures, whereas land abandonment and recolonization by wild vegetation is a general process occurring in the slopes, mainly in low-value land (i.e., not near the coast). The second reason is that degradation of the coastal area implies a reduction in moisture for the water cycle, as well as an increase in air temperature (urban heat effect and soil sealing). As temperatures rise, the capacity for the air to retain vapor (saturated vapor density) increases exponentially, and therefore, the condensation level moves up in altitude (Millán et al. 2005b). Therefore, a small change in air temperature at the coast implies a large increase in the altitude

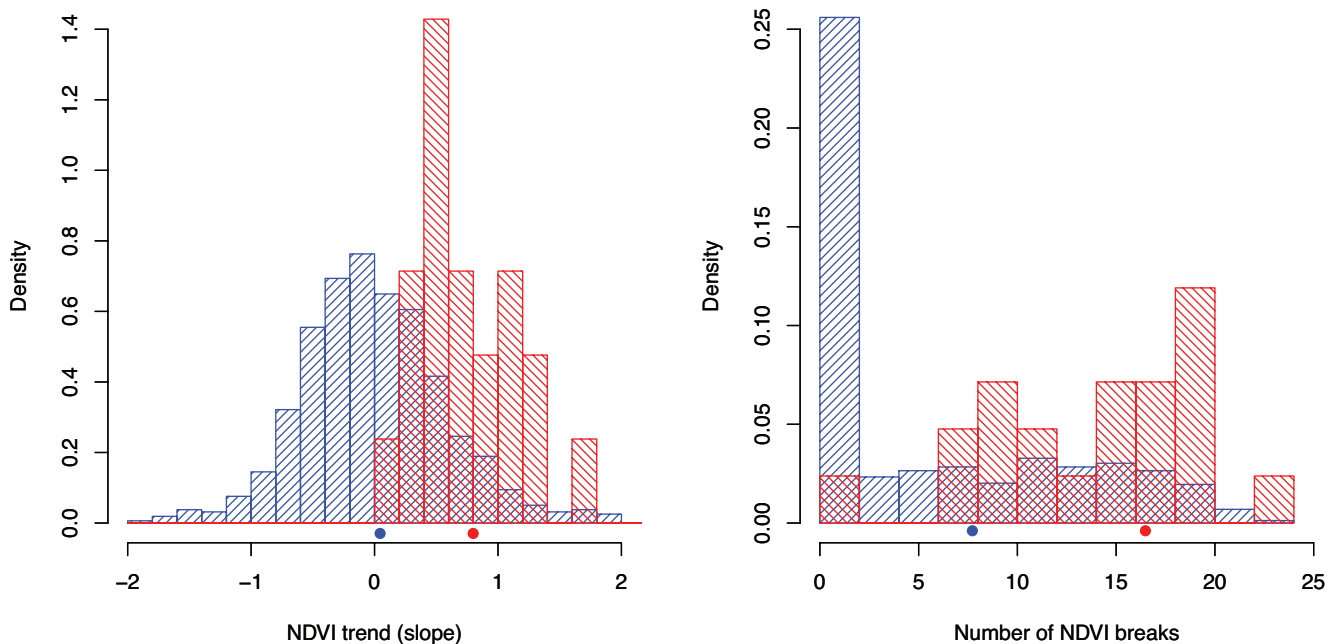

**Figure 4.** Histogram (probability density) of the slopes (a) and the number of breaks (b) in the NDVI trend for the period 2000–2015 for all world ecoregions (the blue stripes with positive slopes,  $n = 792$ ) and for the ecoregions in the Mediterranean basin (the red stripes with negative slopes,  $n = 21$ ). The dots on the x-axes indicate the mean value (weighted by the size of the ecoregion) for all world ecoregions (in blue, to the left) and for the Mediterranean basin (in red, to the right). The figures show that the NDVI dynamics in the Mediterranean basin tend to be stronger (higher slopes and more breaks) than most of the other biomes. The NDVI data by ecoregion are from Pausas and Ribeiro (2017; see supplemental material S1 for details).

at which the water vapor driven by sea breeze precipitates and, therefore, fewer storms occur (Millán 2014). All the feedback processes related to coastal degradation are driven by fine-scale patterns (orography, size of minor catchments), and these patterns are not well captured by most simulation models (Millán 2014, Tierney et al. 2017).

### The Mediterranean conundrum: Policy implications

Greening driven by rural abandonment is generally masking the browning effects of increased droughts, unnatural fire regimes, and the disruption of the hydrological cycle that is occurring simultaneously. Both greening and browning processes outlined above are especially occurring in Mediterranean Europe and will be exacerbated as countries from the southern rim (North Africa) abandon their rural life style as a consequence of increasing industrialization and tourism (Chergui et al. 2018).

Land abandonment is, to some extent, buffering the consequences of global warming. Therefore, it may also reduce the social perception of the effects of warming in the region. Drought-induced defoliation and mortality events occur (Barbeta et al. 2015, Lloret et al. 2016), phenological changes are noticeable (in crops and wildlife; e.g., Gordo and Sanz 2005), and soil erosion is observed. However, for the moment, greening is still the dominant trend (figure 4), and this contributes to reduced soil losses (Keesstra 2007). As droughts increase in frequency the balance could switch

easily with the browning offsetting the greening. How far are we from the turning point when water availability will limit further greening? Can land management delay reaching this threshold?

The urgent need for global policies to reduce emissions is well known; however, given the importance of fine-scale processes (figure 2), some local actions are also important and probably underestimated by local agencies. In the present article, we outline some local policies and research needed to disrupt the two feedback processes sketched in figure 2.

**Fire.** Fire requires three components (fuel, ignitions, and dry conditions), and all three are increasing in Mediterranean ecosystems (figure 2); therefore, fires are likely to increase in the coming decades. Fire policies in most Mediterranean countries are based on the zero-tolerance principle—that is, preventing and extinguishing all fires; this is often very effective (at short time scales) but leads to larger high intensity fires (megafires) in the long run (Piñol et al. 2007, Curt and Frejaville 2018). A policy of small or low-intensity fires would be desirable for preventing large catastrophic fires and, therefore, generating a more sustainable fire regime. This can be achieved by the introduction of prescribed burns, currently forbidden in many countries, and by letting some wildfires burn (those that burn in relatively mild conditions; Boisramé et al. 2017). Low-intensity fires can

ameliorate water stress in Mediterranean trees (Alfaro-Sánchez et al. 2016, Young et al. 2017) and can prevent large, high-intensity fires. In addition, the introduction of grazing animals (e.g., enhancing pastoralism, prescribed grazing, or rewilding natural herbivores) would be helpful, as long as they are introduced with care (e.g., avoiding overgrazing, especially in postfire environments). Other management options, such as forest thinning, can also be helpful at strategic points to reduce the chance of fire ignitions and spread. Appropriate urban planning is also key, because semiurban areas provide the main fire ignition points. In many Mediterranean ecosystems, fire is a disaster only where human infrastructures are found, because many plants are well adapted to fires, including to high-intensity fires (Keeley et al. 2012). That is, the wildland–urban interface can convert ecologically sustainable fire regimes into a social catastrophes. Therefore, reducing the wildland–urban interface or at least limiting its expansion (e.g., using taxation as a deterrent) is highly desirable.

An important topic for research in relation to fire management is the carbon balance with recurrent Mediterranean fires and the role of fire management in modulating this balance. In the short term, fire releases large amounts of CO<sub>2</sub>. However, in the longer term, regeneration (and especially resprouting) quickly fixes large amounts of carbon and, therefore, fires may switch senescent communities to carbon sinks. In addition, charcoal is a recalcitrant carbon contribution to the soil, and therefore, fires increase the carbon sink (Santín et al. 2015). To what extent prescribed fires can be used to optimize the source–sink balance remains to be studied in detail. The dominance of species with high postfire resprouting capacity (and with large underground organs; Pausas et al. 2018) makes studying this balance in Mediterranean ecosystems especially appropriate.

**Drought.** An important direct policy needed for the Mediterranean regions is to reactivate the water cycle that has been disrupted by coastal degradation. Research in eastern Spain suggests that to generate water condensation on the coastal mountains (e.g. 2000 meters above sea level), the average amount of water needed in the air is greater (at least 21 grams per kilogram) than the average observed (Millán 2014, supplemental material S2). This emphasizes the need to pump water into the cycling system in order to change a negative into a positive feedback and, therefore, prevent a reduction in the number of storms. This could be undertaken by massive revegetation of the lowlands around the coast, including degraded wildlands (revegetation with native plants) and also by greening semiurban and urban areas. This would include encouraging the planting of trees on urban streets, the creation of large urban and semiurban gardens, and conserving and enlarging all patches of native vegetation along the coast. The evapotranspiration of all this vegetation (native, urban, and semiurban) would benefit the water cycle upstream (Ellison et al. 2012). In fact, these actions have social benefits far beyond activating the

water cycle (Willis and Petrokofsky 2017, Endreny et al. 2017). Maximum priority should be given to preserving, restoring, and enlarging coastal marshes and wetlands, because they provide very important water inputs into the system, in addition to being hotspots of biodiversity and carbon sinks (Howard et al. 2017). Given that a small change in air temperature on the coast has implications for the upslope rainfall in the mountains, it is important to reduce urban heat as much as possible. Therefore, in urban areas, building using cool materials (i.e., pavement and rooftops with high reflectance and a high emissivity factor) could be considered (Santamouris et al. 2012). Such building techniques would also reduce cooling needs inside buildings and have a positive environmental impact (Santamouris et al. 2008). Installing fog collectors in the coastal mountains would facilitate capturing water from sea breeze (nonrainfall water; Estrela et al. 2008, Kaseke et al. 2017, Kim et al. 2017) that could be used for agricultural irrigation while saving water and reactivating the water cycle.

Mechanisms acting at a fine scale, together with global drivers (CO<sub>2</sub> enrichment and climatic warming) interact and drive current vegetation changes in Mediterranean landscapes. Any model intended to predict the future of our vegetation and climate must include these local mechanisms, and failing to consider them at an appropriate scale is likely to produce inconclusive predictions (Diffenbaugh et al. 2007, Millán 2014, Tierney et al. 2017). Current global and most regional models for the Mediterranean area (e.g., Milano et al. 2012, Guiot and Cramer 2016) still suffer some of these deficiencies. The advantage of the importance of small-scale drivers is that local policies and management actions can make a difference in reducing global change impacts.

### Acknowledgment

This research was supported by *Generalitat Valenciana*, Spain, grant no. PROMETEO/2016/021.

### Supplemental material

Supplemental data are available at *BIOSCI* online.

### References cited

- Alfaro-Sánchez R, Camarero JJ, Sánchez-Salguero R, Sangüesa-Barreda G, De Las Heras J. 2016. Post-fire Aleppo pine growth, C and N isotope composition depend on site dryness. *Trees* 30: 581–595.
- Barbeta A, Mejía-Chang M, Ogaya R, Voltas J, Dawson TE, Peñuelas J. 2015. The combined effects of a long-term experimental drought and an extreme drought on the use of plant-water sources in a Mediterranean forest. *Global Change Biology* 21: 1213–1225.
- Bedia J, Herrera S, Camia A, Moreno JM, Gutiérrez JM. 2014. Forest fire danger projections in the Mediterranean using ENSEMBLES regional climate change scenarios. *Climatic Change* 122: 185–199.
- Boisramé G, Thompson S, Collins B, Stephens S. 2017. Managed wildfire effects on forest resilience and water in the Sierra Nevada. *Ecosystems* 20: 717–732.
- Bolle H-J. 2003. Climate, climate variability, and impacts in the Mediterranean area: An overview. Pages 5–86 in Bolle H-J, ed. *Mediterranean Climate: Variability and Trends*. Springer Berlin Heidelberg.

- Bozkurt D, Sen OL. 2011. Precipitation in the Anatolian Peninsula: Sensitivity to increased SSTs in the surrounding seas. *Climate Dynamics* 36: 711–726.
- Chergui B, Fahd S, Santos X, Pausas JG. 2018. Socioeconomics drive fire regime variability in the Mediterranean Basin. *Ecosystems* 21: 619–628.
- Cortambert E, ed. 1870. *Nouvel atlas de géographie*. Librairie Hachette.
- Ciarlo JM, Aquilina NJ. 2016. An analysis of teleconnections in the Mediterranean region using RegCM4. *International Journal of Climatology* 36: 797–808.
- Curt T, Frejaville T. 2018. Wildfire policy in Mediterranean France: How far is it efficient and sustainable? *Risk Analysis* 38: 472–488.
- De Cáceres M, Martínez-Vilalta J, Coll L, Llorens P, Casals P, Poyatos R, Pausas JG, Brotons L. 2015. Coupling a water balance model with forest inventory data to predict drought stress: The role of forest structural changes versus climate changes. *Agricultural and Forest Meteorology* 213: 77–90.
- Debussche M, Lepart J, Dervieux A. 1999. Mediterranean landscape changes: Evidence from old postcards. *Global Ecology and Biogeography Letters* 8: 3–15.
- Diffenbaugh NS, Pal JS, Giorgi F, Gao X. 2007. Heat stress intensification in the Mediterranean climate change hotspot. *Geophysical Research Letters* 34: L11706.
- Endreny T, Santagata R, Perna A, Stefano CD, Rallo RF, Ulgiati S. 2017. Implementing and managing urban forests: A much needed conservation strategy to increase ecosystem services and urban wellbeing. *Ecological Modelling* 360: 328–335.
- Ellison D, Futter MN, Bishop K. 2012. On the forest cover–water yield debate: From demand- to supply-side thinking. *Global Change Biology* 18: 806–820.
- Estrela MJ, Valiente JA, Corell D, Millán MM. 2008. Fog collection in the western Mediterranean basin (Valencia region, Spain). *Atmospheric Research* 87: 324–337.
- Faluccci A, Maiorano L, Boitani L. 2007. Changes in land-use/land-cover patterns in Italy and their implications for biodiversity conservation. *Landscape Ecology* 22: 617–631.
- Fulé PZ, Ribas M, Gutiérrez E, Vallejo R, Kaye MW. 2008. Forest structure and fire history in an old *Pinus nigra* forest, eastern Spain. *Forest Ecology and Management* 255: 1234–1242.
- Gangoiti G, Alonso L, Navazo M, García JA, Millán MM. 2006. North African soil dust and European pollution transport to America during the warm season: Hidden links shown by a passive tracer simulation. *Journal of Geophysical Research: Atmospheres* 111: D10109.
- Gangoiti G, Gómez-Domenech I, Sáez de Cámara E, Alonso L, Navazo M, Iza J, García JA, Ildardia JL, Millán MM. 2011. Origin of the water vapor responsible for the European extreme rainfalls of August 2002: 2. A new methodology to evaluate evaporative moisture sources, applied to the August 11–13 central European rainfall episode. *Journal of Geophysical Research: Atmospheres* 116: 16.11.2011.
- Giorgi F. 2006. Climate change hot-spots. *Geophysical Research Letters* 33: L08707.
- Giorgi F, Lionello P. 2008. Climate change projections for the Mediterranean region. *Global and Planetary Change* 63: 90–104.
- Gordo O, Sanz JJ. 2005. Phenology and climate change: A long-term study in a Mediterranean locality. *Oecologia* 146: 484–495.
- Gouveia CM, Bistinas I, Liberato MLR, Bastos A, Koutsias N, Trigo R. 2016. The outstanding synergy between drought, heatwaves and fuel on the 2007 Southern Greece exceptional fire season. *Agricultural and Forest Meteorology* 218–219: 135–145.
- Guiot J, Cramer W. 2016. Climate change: The 2015 Paris Agreement thresholds and Mediterranean basin ecosystems. *Science* 354: 465–468.
- Held IM, Soden BJ. 2000. Water vapor feedback and global warming. *Annual Review of Energy and the Environment* 25: 441–475.
- Howard J, Sutton-Grier A, Herr D, Kleypas J, Landis E, McLeod E, Pidgeon E, Simpson S. 2017. Clarifying the role of coastal and marine systems in climate mitigation. *Frontiers in Ecology and the Environment* 15: 42–50.
- [IPCC] Intergovernmental Panel on Climate Change. 2014. *Climate Change 2014: Synthesis Report. Contribution of Working Groups I, II and III to the Fifth Assessment Report of the Intergovernmental Panel on Climate Change*. IPCC.
- Jenness J, Dooley J, Aguilar-Manjarrez J, Riva C. 2007. *African Water Resource Database. GIS-based tools for inland aquatic resource management*. 2. Technical manual and workbook. CIFA technical paper no. 33, part 2. Food and Agriculture Organization of the United Nations.
- Kaseke KF, Wang L, Seely MK. 2017. Nonrainfall water origins and formation mechanisms. *Science Advances* 3: e1603131.
- Keeley JE, Bond WJ, Bradstock RA, Pausas JG, Rundel PW. 2012. *Fire in Mediterranean Ecosystems: Ecology, Evolution, and Management*. Cambridge University Press.
- Keesstra SD. 2007. Impact of natural reforestation on floodplain sedimentation in the Dragonja basin, SW Slovenia. *Earth Surface Processes and Landforms* 32: 49–65.
- Kim H, Yang S, Rao SR, Narayanan S, Kapustin EA, Furukawa H, Umans AS, Yaghi OM, Wang EN. 2017. Water harvesting from air with metal-organic frameworks powered by natural sunlight. *Science* 356: 430–434.
- Kirkby J, et al. 2016. Ion-induced nucleation of pure biogenic particles. *Nature* 533: 521–526.
- Knorr W, Arneth A, Jiang L. 2016. Demographic controls of future global fire risk. *Nature Clim. Change* 6: 781–785.
- Lelieveld J, et al. 2012. Climate change and impacts in the Eastern Mediterranean and the Middle East. *Climatic Change* 114: 667–687.
- Lloret F, Riva EG, Pérez-Ramos IM, Marañón T, Saura-Mas S, Díaz-Delgado R, Villar R. 2016. Climatic events inducing die-off in Mediterranean shrublands: Are species' responses related to their functional traits? *Oecologia* 180: 961–973.
- Mariotti A, Zeng N, Yoon J-H, Artale V, Navarra V, Alpert P, Li LZ. 2008. Mediterranean water cycle changes: Transition to drier 21st century conditions in observations and CMIP3 simulations. *Environmental Research Letters* 3: 044001.
- Milano M, Ruelland D, Fernandez S, Dezetter A, Fabre J, Servat E. 2012. Facing climatic and anthropogenic changes in the Mediterranean basin: What will be the medium-term impact on water stress? *Comptes Rendus Geoscience* 344: 432–440.
- Millán MM. 2014. Extreme hydrometeorological events and climate change predictions in Europe. *Journal of Hydrology* 518: 206–224.
- Millán MM, Estrela MJ, Miró J. 2005a. Rainfall Components: Variability and Spatial Distribution in a Mediterranean Area (Valencia Region). *Journal of Climate* 18: 2682–2705.
- Millán MM, Estrela MJ, Sanz MJ, Mantilla E, Martín M, Pastor F, Salvador R, Vallejo R, Alonso L, Gangoiti G. 2005b. Climatic feedbacks and desertification: The Mediterranean model. *Journal of Climate* 18: 684–701.
- Modugno S, Balzter H, Cole B, Borrelli P. 2016. Mapping regional patterns of large forest fires in Wildland–Urban Interface areas in Europe. *Journal of Environmental Management* 172: 112–126.
- Moreira F, et al. 2011. Landscape–wildfire interactions in southern Europe: Implications for landscape management. *Journal of Environmental Management* 92: 2389–2402.
- Moriondo M, Good P, Durao R, Bindi M, Giannakopoulos C, Corte-Real J. 2006. Potential impact of climate change on fire risk in the Mediterranean area. *Climate Research* 31: 85–95.
- Myers N, Mittermeier RA, Mittermeier CG, da Fonseca GAB, Kent J. 2000. Biodiversity hotspots for conservation priorities. *Nature* 403: 853–858.
- Park J-Y, Bader J, Matei D. 2016. Anthropogenic Mediterranean warming essential driver for present and future Sahel rainfall. *Nature Clim. Change* 6: 941–945.
- Pastor F, Valiente JA, Estrela MJ. 2015. Sea surface temperature and torrential rains in the Valencia region: Modelling the role of recharge areas. *Nat. Hazards Earth Syst. Sci.* 15: 1677–1693.
- Pausas JG. 2004. Changes in fire and climate in the eastern Iberian Peninsula (Mediterranean basin). *Climatic Change* 63: 337–350.



- Pausas JG, Fernández-Muñoz S. 2012. Fire regime changes in the Western Mediterranean Basin: From fuel-limited to drought-driven fire regime. *Climatic Change* 110: 215–226.
- Pausas JG, Paula S. 2012. Fuel shapes the fire–climate relationship: evidence from Mediterranean ecosystems. *Global Ecology and Biogeography* 21: 1074–1082.
- Pausas JG, Keeley JE. 2014. Abrupt climate-independent fire regime changes. *Ecosystems* 17: 1109–1120.
- Pausas JG. 2015. Evolutionary fire ecology: lessons learned from pines. *Trends in Plant Science* 20: 318–324.
- Pausas JG, Ribeiro E. 2017. Fire and plant diversity at the global scale. *Global Ecology and Biogeography* 26: 889–897.
- Pausas JG, Lamont BB, Paula S, Appezzato-da-Glória B, Fidelis A. 2018. Unearthing belowground bud banks in fire-prone ecosystems. *New Phytologist* 217: 1435–1448.
- Piñol J, Castellnou M, Beven KJ. 2007. Conditioning uncertainty in ecological models: Assessing the impact of fire management strategies. *Ecological Modelling* 207: 34–44.
- Retana J, Espelta JM, Habrouk A, Ordoñez JL, de Solà-Morales F. 2002. Regeneration patterns of three Mediterranean pines and forest changes after a large wildfire in northeastern Spain. *Ecoscience* 9: 89–97.
- Santamouris M, Synnefa A, Kolokotsa D, Dimitriou V, Apostolakis K. 2008. Passive cooling of the built environment – use of innovative reflective materials to fight heat islands and decrease cooling needs. *International Journal of Low-Carbon Technologies* 3:71–82.
- Santamouris M, Gaitani N, Spanou A, Saliari M, Giannopoulou K, Vasilakopoulou K, Kardomateas T. 2012. Using cool paving materials to improve microclimate of urban areas: Design realization and results of the flisvos project. *Building and Environment* 53: 128–136.
- Santín C, Doerr SH, Preston CM, González-Rodríguez G. 2015. Pyrogenic organic matter production from wildfires: A missing sink in the global carbon cycle. *Global Change Biology* 21: 1621–1633.
- Skliris N, Zika JD, Herold L, Josey SA, Marsh R. 2018. Mediterranean sea water budget long-term trend inferred from salinity observations. *Climate Dynamics* 51: 2857–2876.
- Slimani S, Touchan R, Derridj A, Kherchouche D, Gutiérrez E. 2014. Fire history of Atlas cedar (*Cedrus atlantica* Manetti) in Mount Chéla, northern Algeria. *Journal of Arid Environments* 104: 116–123.
- Sousa PM, Trigo RM, Pereira MG, Bedia J, Gutiérrez JM. 2015. Different approaches to model future burnt area in the Iberian Peninsula. *Agricultural and Forest Meteorology* 202: 11–25.
- Taylor CM, Belušić D, Guichard F, Parker DJ, Vischel T, Bock O, Harris PP, Janicot S, Klein C, Panthou G. 2017. Frequency of extreme Sahelian storms tripled since 1982 in satellite observations. *Nature* 544: 475.
- Thompson JD. 2005. *Plant evolution in the Mediterranean*. Oxford University Press.
- Tierney JE, Pausata FSR, deMenocal PB. 2017. Rainfall regimes of the Green Sahara. *Science Advances* 3: e1601503.
- Turco M, Rosa-Cánovas JJ, Bedia J, Jerez S, Montávez JP, Llasat MC, Provenzale A. 2018. Exacerbated fires in Mediterranean Europe due to anthropogenic warming projected with non-stationary climate-fire models. *Nature Communications* 9: 3821.
- Vayreda J, Martínez-Vilalta J, Gracia M, Retana J. 2012. Recent climate changes interact with stand structure and management to determine changes in tree carbon stocks in Spanish forests. *Global Change Biology* 18: 1028–1041.
- Verbesselt J, Hyndman R, Newnham G, Culvenor D. 2010. Detecting trend and seasonal changes in satellite image time series. *Remote Sensing of Environment* 114: 106–115.
- Willis KJ, Petrokofsky G. 2017. The natural capital of city trees. *Science* 356: 374–376.
- Young DJN, Stevens JT, Earles JM, Moore J, Ellis A, Jirka AL, Latimer AM. 2017. Long-term climate and competition explain forest mortality patterns under extreme drought. *Ecology Letters* 20: 78–86.

---

*Juli G. Pausas (juli.g.pausas@uv.es, www.uv.es/jgpausas/, @jgpausas) is an ecologist at the Centro de Investigaciones sobre Desertificación of the Spanish National Research Council (CIDE-CSIC), in Valencia, Spain. He studies the role of disturbance in shaping nature at different scales. Millán M. Millán (millanmmillan@gmail.com) is an atmospheric physicist at the Centro de Estudios Ambientales del Mediterráneo (CEAM) in Valencia, Spain. He studies air pollution and atmospheric circulations in the Mediterranean Basin.*
